# Supplementary material for: Fulminic acid: a quasibent spectacle
Source: Royal Society of Chemistry journal article supplement (doi:10.1039/d4cp02700k), 2024-01-01
Supplement: d4cp02700k1.pdf [file d4cp02700k1.pdf]

## Supplementary Information

### Fulminic Acid: A Quasibent Spectacle

Ashley M. Allen, Laura N. Olive, P. Alejandra Gonzalez Franco, Shiblee R. Barua,  
Wesley D. Allen, and Henry F. Schaefer III\*

*Center for Computational Quantum Chemistry, University of Georgia, Athens, Georgia 30602,  
United States*

#### Table of Contents

- |                                                                                             |       |
|---------------------------------------------------------------------------------------------|-------|
| 1. AE-CCSD(T)/CBS quartic force field of linear HCNO (Table S1)                             | p. S2 |
| 2. Total energies (in $E_h$ ) for the FPA computation of $D_e(\text{HCN-O})$ (Tables S2-S4) | p. S3 |

## 1. Quartic Force Field

Table S1. AE-CCSD(T)/CBS quartic force field of linear HCNO<sup>a</sup>

| $ij$   | $F_{ij}$   | $ij$        | $F_{ij}$   | $ij$        | $F_{ij}$   |
|--------|------------|-------------|------------|-------------|------------|
| 11     | 6.4872     | 31          | -0.1027    | 44 = 66     | 0.0418     |
| 21     | -0.1450    | 32          | 0.8325     | 54 = 76     | 0.1533     |
| 22     | 18.5293    | 33          | 11.1299    | 55 = 77     | 0.6763     |
| $ijk$  | $F_{ijk}$  | $ijk$       | $F_{ijk}$  | $ijk$       | $F_{ijk}$  |
| 111    | -36.824    | 331         | 0.053      | 541 = 761   | 0.008      |
| 211    | 0.345      | 332         | -1.331     | 542 = 762   | 0.546      |
| 221    | -0.136     | 333         | -89.507    | 543 = 763   | -0.232     |
| 222    | -118.835   | 441 = 661   | -0.166     | 551 = 771   | -0.036     |
| 311    | 0.046      | 442 = 662   | -1.129     | 552 = 772   | -1.767     |
| 321    | -0.016     | 443 = 663   | 0.375      | 553 = 773   | -1.564     |
| 322    | -2.851     |             |            |             |            |
| $ijkl$ | $F_{ijkl}$ | $ijkl$      | $F_{ijkl}$ | $ijkl$      | $F_{ijkl}$ |
| 1111   | 187.86     | 4411 = 6611 | -0.013     | 5521 = 7721 | -0.236     |
| 2111   | 1.331      | 4421 = 6621 | 0.156      | 5522 = 7722 | -0.414     |
| 2211   | -4.052     | 4422 = 6622 | -0.938     | 5531 = 7731 | -0.008     |
| 2221   | 1.802      | 4431 = 6631 | -0.100     | 5532 = 7732 | 3.112      |
| 2222   | 636.69     | 4432 = 6632 | 0.544      | 5533 = 7733 | 2.127      |
| 3111   | 2.217      | 4433 = 6633 | -0.150     | 5544 = 7766 | -0.212     |
| 3211   | -1.602     | 4444 = 6666 | 0.729      | 5554 = 7776 | 0.142      |
| 3221   | -0.525     | 5421 = 7621 | 1.025      | 5555 = 7777 | 4.165      |
| 3222   | 5.095      | 5422 = 7622 | 0.477      | 7644        | -0.008     |
| 3311   | -1.992     | 5431 = 7631 | 1.044      | 7654        | -0.031     |
| 3321   | -0.998     | 5432 = 7632 | 0.364      | 7655        | 0.047      |
| 3322   | 3.305      | 5433 = 7633 | -0.038     | 7744        | -0.151     |
| 3331   | 2.782      | 5444 = 7666 | -0.023     | 7754        | 0.047      |
| 3332   | 13.278     | 5511 = 7711 | -0.223     | 7755        | 1.388      |
| 3333   | 529.53     |             |            |             |            |

Internal coordinates:  $S_1 = r(\text{H-C})$ ,  $S_2 = r(\text{C-N})$ ,  $S_3 = r(\text{N-O})$ ,  
 $S_4 = \theta_x(\text{H-C-N})$ ,  $S_5 = \theta_x(\text{C-N-O})$ ,  $S_6 = \theta_y(\text{H-C-N})$ ,  $S_7 = \theta_y(\text{C-N-O})$

<sup>a</sup>Units consistent with energy in aJ, bond distances in Å, and bond angles in rad. The linear bending angles are defined to have displacements of the same sign upon *cis*-bending. Reference geometry:  $[r_e(\text{H-C}), r_e(\text{C-N}), r_e(\text{N-O})] = (1.05922, 1.15801, 1.20184)$  Å.

## 2. Total energies (in $E_h$ ) for the FPA computation of $D_e(\text{HCN-O})$

**Table S2. Linear HCNO total energies at the AE-CCSDTQ(P)/CBS + MVD1 reference geometry<sup>a</sup>**

|               | $\Delta E_e(\text{HF})$ | $\delta[\text{MP2}]$ | $\delta[\mathcal{C}]$ | $\delta[\mathcal{C}(\text{T})]$ | $\delta[\mathcal{C}\text{T}]$ | $\delta[\mathcal{C}\text{T}(\text{Q})]$ | $\delta[\mathcal{C}\text{TQ}]$ | $\delta[\mathcal{C}\text{TQ}(\text{P})]$ | $\delta[\mathcal{C}\text{TQP}]$ | $\delta[\mathcal{C}\text{TQP}(\text{H})]$ |
|---------------|-------------------------|----------------------|-----------------------|---------------------------------|-------------------------------|-----------------------------------------|--------------------------------|------------------------------------------|---------------------------------|-------------------------------------------|
| 6-31G* (FC)   | -167.62739725           | -168.10742976        | -168.10529085         | -168.12656949                   | -168.12660078                 | -168.12956504                           | -168.12903906                  | -168.12900408                            | -168.12923665                   | -168.12922970                             |
| cc-pVDZ (FC)  | -167.64392020           | -168.13514861        | -168.13355834         | -168.15559560                   | -168.15556096                 | -168.15858027                           | -168.15800830                  | -168.15795394                            |                                 |                                           |
| cc-pVTZ (FC)  | -167.69439791           | -168.29809341        | -168.28829116         | -168.32107277                   | -168.32042252                 | -168.32356804                           |                                |                                          |                                 |                                           |
| cc-pCVQZ (FC) | -167.70751115           | -168.35606474        | -168.33934997         | -168.37524662                   |                               |                                         |                                |                                          |                                 |                                           |
| cc-pCVQZ (AE) | -167.70751115           | -168.52167369        | -168.50902170         | -168.54651287                   |                               |                                         |                                |                                          |                                 |                                           |
| cc-pCV5Z (AE) | -167.71034057           | -168.54453598        | -168.52733350         | -168.56576292                   |                               |                                         |                                |                                          |                                 |                                           |
| cc-pCV6Z (AE) | -167.71066768           | -168.55372640        | -168.53386159         | -168.57263222                   |                               |                                         |                                |                                          |                                 |                                           |

<sup>a</sup> $\mathcal{C}$  is shorthand for CCSD. (FC, AE) specifies whether a given row pertains to (frozen-core, all-electron) computations.

**Table S3. HCN total energies at the AE-CCSDTQ(P)/CBS + MVD1 reference geometry<sup>a</sup>**

|               | $\Delta E_e(\text{HF})$ | $\delta[\text{MP2}]$ | $\delta[\mathcal{C}]$ | $\delta[\mathcal{C}(\text{T})]$ | $\delta[\mathcal{C}\text{T}]$ | $\delta[\mathcal{C}\text{T}(\text{Q})]$ | $\delta[\mathcal{C}\text{TQ}]$ | $\delta[\mathcal{C}\text{TQ}(\text{P})]$ | $\delta[\mathcal{C}\text{TQP}]$ | $\delta[\mathcal{C}\text{TQP}(\text{H})]$ |
|---------------|-------------------------|----------------------|-----------------------|---------------------------------|-------------------------------|-----------------------------------------|--------------------------------|------------------------------------------|---------------------------------|-------------------------------------------|
| 6-31G* (FC)   | -92.87336566            | -93.15315906         | -93.16185865          | -93.17334771                    | -93.17356380                  | -93.17497209                            | -93.17477681                   | -93.17493646                             | -93.17492852                    | -93.17494007                              |
| cc-pVDZ (FC)  | -92.88326275            | -93.16737990         | -93.17641216          | -93.18826287                    | -93.18846522                  | -93.18989283                            | -93.18969166                   | -93.18985770                             |                                 |                                           |
| cc-pVTZ (FC)  | -92.90807939            | -93.25321219         | -93.25725008          | -93.27511096                    | -93.27495945                  | -93.27653841                            |                                |                                          |                                 |                                           |
| cc-pCVQZ (FC) | -92.91459079            | -93.28361553         | -93.28329546          | -93.30281495                    |                               |                                         |                                |                                          |                                 |                                           |
| cc-pCVQZ (AE) | -92.91459079            | -93.39079925         | -93.39352052          | -93.41408010                    |                               |                                         |                                |                                          |                                 |                                           |
| cc-pCV5Z (AE) | -92.91574891            | -93.40315363         | -93.40308699          | -93.42414416                    |                               |                                         |                                |                                          |                                 |                                           |
| cc-pCV6Z (AE) | -92.91588156            | -93.40826143         | -93.40656597          | -93.42780307                    |                               |                                         |                                |                                          |                                 |                                           |

<sup>a</sup>See footnote of Table S2.

**Table S4. O(<sup>3</sup>P) total energies<sup>a</sup>**

|               | $\Delta E_c(\text{HF})$ | $\delta[\text{MP2}]$ | $\delta[\mathcal{C}]$ | $\delta[\mathcal{C}(\text{T})]$ | $\delta[\mathcal{C}\text{T}]$ | $\delta[\mathcal{C}\text{T}(\text{Q})]$ | $\delta[\mathcal{C}\text{TQ}]$ | $\delta[\mathcal{C}\text{TQ}(\text{P})]$ | $\delta[\mathcal{C}\text{TQP}]$ | $\delta[\mathcal{C}\text{TQP}(\text{H})]$ |
|---------------|-------------------------|----------------------|-----------------------|---------------------------------|-------------------------------|-----------------------------------------|--------------------------------|------------------------------------------|---------------------------------|-------------------------------------------|
| 6-31G* (FC)   | -74.78318092            | -74.87815958         | -74.89390972          | -74.89474933                    | -74.89489554                  | -74.894942279                           | -74.89495186                   | -74.894954432                            | -74.89495492                    | -74.89495487                              |
| cc-pVDZ (FC)  | -74.79216606            | -74.89413156         | -74.90920062          | -74.90995028                    | -74.91006245                  | -74.91013058                            | -74.91014048                   | -74.91014266                             |                                 |                                           |
| cc-pVTZ (FC)  | -74.81175662            | -74.95490238         | -74.97105037          | -74.97396183                    | -74.97425182                  | -74.974302711                           |                                |                                          |                                 |                                           |
| cc-pCVQZ (FC) | -74.81735974            | -74.97674336         | -74.99138896          | -74.99516165                    |                               |                                         |                                |                                          |                                 |                                           |
| cc-pCVQZ (AE) | -74.81735974            | -75.03426423         | -75.05001159          | -75.05409082                    |                               |                                         |                                |                                          |                                 |                                           |
| cc-pCV5Z (AE) | -74.81878776            | -75.04261420         | -75.05706347          | -75.06140276                    |                               |                                         |                                |                                          |                                 |                                           |
| cc-pCV6Z (AE) | -74.81894796            | -74.81894796         | -75.05945183          | -75.06387986                    |                               |                                         |                                |                                          |                                 |                                           |

<sup>a</sup>See footnote of Table S2. UHF orbitals were employed for O(<sup>3</sup>P), given that the spin contamination of the UHF reference wavefunction is negligible.
